# Supplementary material
Source: Springer Nature journal article supplement (https://www.springermedizin.de/resource/supplementary/13031_2013_126_MOESM2_ESM.pdf/9645218)

**Sexual Violence ROC Curve (6 month)**

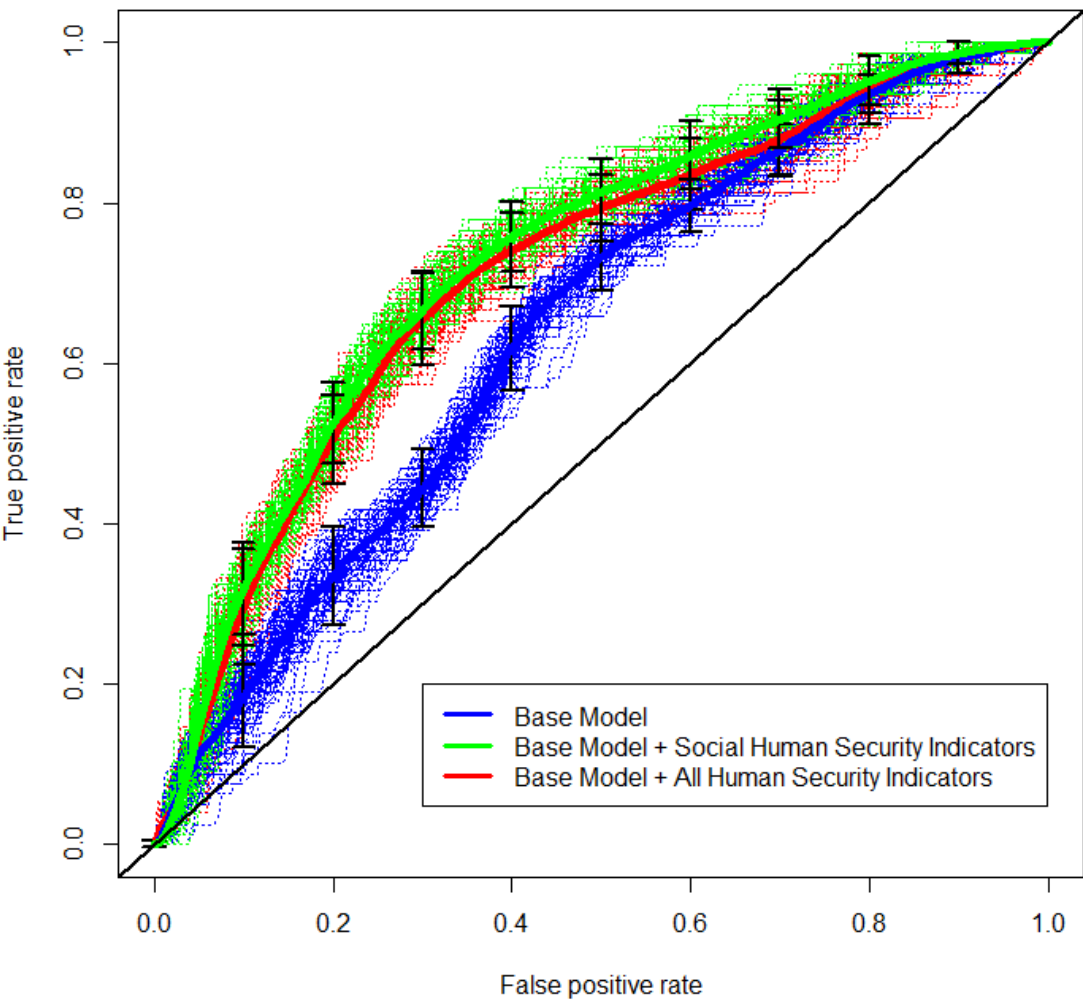

Supplement: MOESM2 [file 9645218]
